# Supplementary material for: The model structure of the hammerhead ribozyme formed by RNAs of reciprocal chirality
Source: Oxford University Press journal article supplement (doi:10.1042/bsr20203424), 2020-12-22
Supplement: bsr-2020-3424_supp.pdf [file bsr-2020-3424_supp.pdf]

# D- or L-RNA

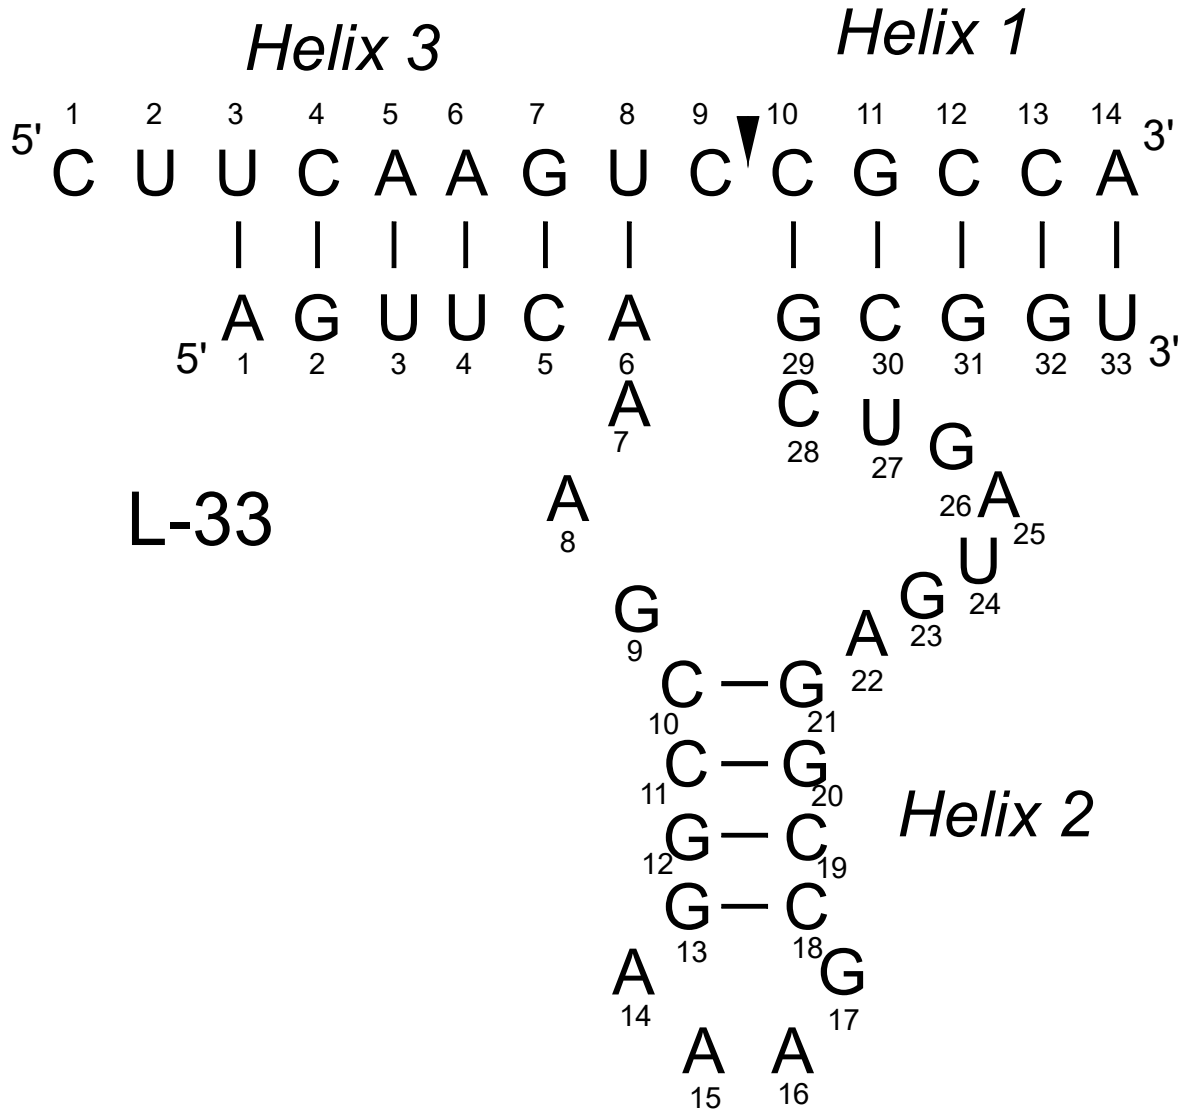

**Supplementary Figure 1.** The secondary structure model of L-Rz/D-RNA putative parallel complex. The both nucleic acid strands run parallel from 5' to 3' end. Residues of 1-6 and 29-33 are 2'-O-CH<sub>3</sub> analogues.

L-Rz

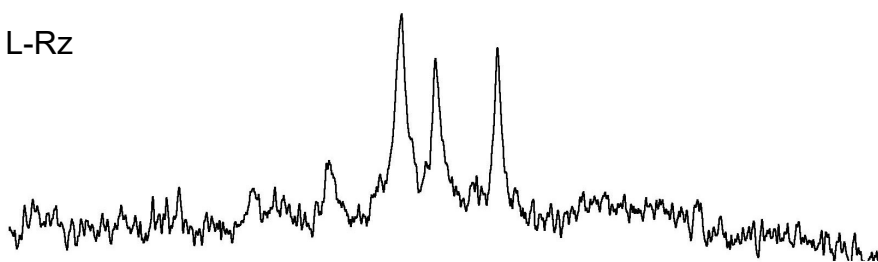

L-Rz/D-RNA

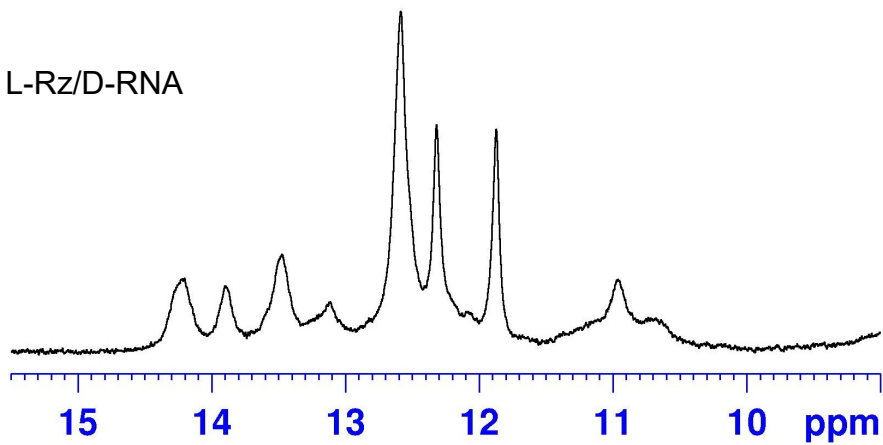

**Supplementary Figure 2.**  $^1\text{H}$  NMR spectrum of the putative parallel complex of L-Rz and D-RNA. D-RNA target, L-Rz alone and L-Rz/D-RNA parallel complex with 150 mM sodium chloride, 10 mM phosphate sodium buffer pH 6.8 and 0.1 mM EDTA.

### Supplementary Fig. 3.

#### D-target / D-ribozyme

|    |   |    | alpha | beta | gamma    | delta    | v0       | v1      | v2      | v3      | v4      | P       | fi     | chi     | epsi   | zeta     |          |          |
|----|---|----|-------|------|----------|----------|----------|---------|---------|---------|---------|---------|--------|---------|--------|----------|----------|----------|
| 1  | A | 1  | C     | c    | .....    | .....    | 21.366   | 90.226  | 17.627  | -35.063 | 38.302  | -29.235 | 7.446  | -7.734  | 38.653 | -176.509 | -111.026 | -63.033  |
| 2  | A | 2  | U     | U    | -46.787  | 153.260  | 54.614   | 82.240  | -0.583  | -22.696 | 36.023  | -37.437 | 23.921 | 19.493  | 38.213 | -160.081 | -141.569 | -58.962  |
| 3  | A | 3  | U     | U    | -68.174  | 176.487  | 47.443   | 86.061  | 9.744   | -30.318 | 38.280  | -33.747 | 15.188 | 4.307   | 38.389 | -156.899 | -154.743 | -64.293  |
| 4  | A | 4  | C     | C    | -63.419  | -168.774 | 35.807   | 83.824  | 6.584   | -28.629 | 38.614  | -35.899 | 18.514 | 9.178   | 39.114 | -152.727 | -154.947 | -77.075  |
| 5  | A | 5  | A     | A    | -56.952  | -179.178 | 39.213   | 85.106  | 8.801   | -29.940 | 38.553  | -34.581 | 16.317 | 5.850   | 38.755 | -148.829 | -154.722 | -71.277  |
| 6  | A | 6  | A     | A    | -64.714  | 169.374  | 58.132   | 82.239  | 1.740   | -24.926 | 37.312  | -37.383 | 22.470 | 16.120  | 38.839 | -160.765 | -155.226 | -74.293  |
| 7  | A | 7  | G     | G    | -69.731  | 179.326  | 54.871   | 83.841  | 2.219   | -24.542 | 36.234  | -36.022 | 21.332 | 15.341  | 37.573 | -155.639 | -156.622 | -59.029  |
| 8  | A | 8  | U     | U    | -72.061  | -166.985 | 42.143   | 86.780  | 3.167   | -23.695 | 34.008  | -33.268 | 19.007 | 13.647  | 34.996 | -149.772 | -125.579 | -80.833  |
| 9  | A | 9  | C     | C    | -49.994  | 179.794  | 44.694   | 141.940 | -23.128 | 35.618  | -33.805 | 21.594  | 0.744  | 159.986 | 35.978 | -119.223 | -110.108 | 87.206   |
| 10 | A | 10 | C     | C    | 78.990   | -141.368 | -75.633  | 85.054  | 7.454   | -28.578 | 37.724  | -34.512 | 17.094 | 7.640   | 38.062 | -162.605 | -125.778 | -78.259  |
| 11 | A | 11 | G     | G    | -80.927  | 147.103  | 83.618   | 81.370  | -8.832  | -15.334 | 32.154  | -38.145 | 29.542 | 31.728  | 37.803 | 177.494  | -154.920 | -64.279  |
| 12 | A | 12 | C     | C    | -74.374  | -163.385 | 40.445   | 84.984  | 7.077   | -28.397 | 37.737  | -34.751 | 17.497 | 8.218   | 38.129 | -149.326 | -124.839 | -82.385  |
| 13 | A | 13 | C     | C    | -88.733  | 115.061  | 106.604  | 86.786  | 12.038  | -31.873 | 38.565  | -32.679 | 13.085 | 0.895   | 38.569 | -177.337 |          |          |
| 14 | A | 14 | A     | A    | -74.069  | -162.507 | 45.198   | 86.712  | 10.270  | -30.383 | 37.838  | -33.021 | 14.428 | 3.340   | 37.902 | -162.724 | -70.740  | -30.014  |
| 15 | B | 1  | U     | u    | .....    | .....    | 57.917   | 86.080  | 6.279   | -27.184 | 36.563  | -34.007 | 17.538 | 9.129   | 37.032 | -163.467 | -160.732 | -57.819  |
| 16 | B | 2  | G     | G    | -69.475  | -162.123 | 37.766   | 81.471  | 0.855   | -24.546 | 37.548  | -38.127 | 23.452 | 17.384  | 39.345 | -154.141 | -133.265 | -79.203  |
| 17 | B | 3  | G     | G    | -92.980  | 121.417  | 111.047  | 86.319  | 7.235   | -27.612 | 36.362  | -33.277 | 16.470 | 7.584   | 36.683 | -179.582 | -145.097 | -67.763  |
| 18 | B | 4  | C     | C    | -68.609  | -173.708 | 44.451   | 86.649  | 10.354  | -30.554 | 38.064  | -33.169 | 14.438 | 3.273   | 38.126 | -156.942 | -150.889 | -74.422  |
| 19 | B | 5  | G     | G    | -64.480  | -172.070 | 61.889   | 146.574 | -18.233 | 34.282  | -36.392 | 26.971  | -5.696 | 169.951 | 36.959 | -129.649 | -165.887 | -108.997 |
| 20 | B | 6  | C     | C    | -67.396  | -175.810 | 43.612   | 138.742 | -30.431 | 40.415  | -34.669 | 18.156  | 7.501  | 150.572 | 39.805 | -119.443 | -88.370  | 154.595  |
| 21 | B | 7  | U     | U    | -80.029  | 111.864  | 76.116   | 84.754  | 1.832   | -23.626 | 35.183  | -35.167 | 21.026 | 15.846  | 36.573 | -152.242 | -147.487 | -47.501  |
| 22 | B | 8  | G     | G    | 152.385  | 149.229  | 60.567   | 85.197  | 5.263   | -26.505 | 36.476  | -34.529 | 18.496 | 10.722  | 37.124 | 179.958  | -135.643 | -68.930  |
| 23 | B | 9  | A     | A    | -59.584  | 169.384  | 42.132   | 85.583  | 13.886  | -34.393 | 40.748  | -33.792 | 12.663 | -0.833  | 40.752 | -160.222 | -114.470 | -69.838  |
| 24 | B | 10 | U     | U    | -7.844   | -137.265 | 41.712   | 139.671 | -24.288 | 36.031  | -33.499 | 20.534  | 2.147  | 157.867 | 36.163 | -141.336 | -80.687  | 59.751   |
| 25 | B | 11 | G     | G    | -128.453 | -165.461 | 52.811   | 93.611  | 17.874  | -33.483 | 35.575  | -26.357 | 5.514  | -10.091 | 36.134 | -76.689  | -155.810 | 99.913   |
| 26 | B | 12 | A     | A    | -48.652  | 140.079  | 38.378   | 87.198  | 10.988  | -30.667 | 37.635  | -32.401 | 13.583 | 2.140   | 37.662 | 177.297  | -127.770 | -64.205  |
| 27 | B | 13 | G     | G    | -62.861  | 166.158  | 54.154   | 82.511  | 4.992   | -27.893 | 38.933  | -37.129 | 20.265 | 11.560  | 39.739 | -173.510 | -158.088 | -71.101  |
| 28 | B | 14 | G     | G    | -62.527  | -172.737 | 49.002   | 80.561  | -2.284  | -22.141 | 36.749  | -39.107 | 26.046 | 21.826  | 39.587 | -167.878 | -149.165 | -71.564  |
| 29 | B | 15 | C     | C    | -83.511  | 170.006  | 71.328   | 81.767  | 0.992   | -24.562 | 37.456  | -37.915 | 23.253 | 17.168  | 39.202 | -165.707 | -158.311 | -71.753  |
| 30 | B | 16 | C     | C    | -66.411  | -166.741 | 38.710   | 85.536  | 8.909   | -29.894 | 38.384  | -34.359 | 16.092 | 5.631   | 38.570 | -151.287 | -153.911 | -59.607  |
| 31 | B | 17 | G     | G    | -69.482  | -175.912 | 45.580   | 83.599  | 5.690   | -27.922 | 38.303  | -36.122 | 19.198 | 10.433  | 38.947 | -155.190 | -142.321 | -63.266  |
| 32 | B | 18 | A     | A    | 144.611  | 154.520  | 62.997   | 88.616  | 10.229  | -29.227 | 36.033  | -31.244 | 13.336 | 2.645   | 36.072 | -171.537 | -141.592 | -67.299  |
| 33 | B | 19 | A     | A    | -73.744  | 161.422  | 66.845   | 89.134  | 11.486  | -30.159 | 36.325  | -30.801 | 12.281 | 0.736   | 36.328 | -164.032 | -157.899 | -51.759  |
| 34 | B | 20 | A     | A    | -78.586  | -164.728 | 45.923   | 91.301  | 14.997  | -32.116 | 36.084  | -28.543 | 8.669  | -5.094  | 36.227 | -144.394 | -137.327 | -80.967  |
| 35 | B | 21 | G     | G    | 120.757  | -120.675 | -160.908 | 88.132  | 12.608  | -31.902 | 38.009  | -31.870 | 12.251 | -0.191  | 38.010 | -177.614 | -145.813 | -64.435  |
| 36 | B | 22 | G     | G    | -66.079  | -178.400 | 53.428   | 81.092  | -3.145  | -20.995 | 35.720  | -38.552 | 26.245 | 23.124  | 38.841 | -167.010 | -155.551 | -61.680  |
| 37 | B | 23 | C     | C    | -69.058  | -175.907 | 48.491   | 82.190  | -2.432  | -20.969 | 35.001  | -37.440 | 25.101 | 22.219  | 37.809 | -152.722 | -153.336 | -73.972  |
| 38 | B | 24 | C     | C    | 101.884  | -156.775 | -129.683 | 84.721  | 6.539   | -28.161 | 37.891  | -35.195 | 18.080 | 9.050   | 38.369 | -164.723 | -145.073 | -53.673  |
| 39 | B | 25 | G     | G    | -67.769  | 163.185  | 64.541   | 83.999  | 2.636   | -24.815 | 36.308  | -35.847 | 20.940 | 14.710  | 37.538 | -168.405 | -167.313 | -108.742 |
| 40 | B | 26 | A     | A    | -57.211  | -166.720 | 46.860   | 88.982  | 11.980  | -30.670 | 36.650  | -30.862 | 12.008 | 0.111   | 36.650 | -161.581 | -146.149 | -59.852  |
| 41 | B | 27 | A     | A    | -67.364  | 174.504  | 48.661   | 86.072  | 11.404  | -31.763 | 38.959  | -33.478 | 13.997 | 2.058   | 38.985 | -156.068 | -147.217 | -75.234  |
| 42 | B | 28 | A     | A    | -61.972  | 156.179  | 62.698   | 85.665  | 7.444   | -28.391 | 37.364  | -34.174 | 16.911 | 7.554   | 37.691 | -160.529 | -140.536 | -76.901  |
| 43 | B | 29 | C     | C    | -64.925  | -179.689 | 40.847   | 85.806  | 10.506  | -31.173 | 38.862  | -33.903 | 14.850 | 3.385   | 38.930 | -155.144 | -157.121 | -68.728  |
| 44 | B | 30 | U     | U    | -63.304  | -173.959 | 41.453   | 85.990  | 8.513   | -29.272 | 37.742  | -33.906 | 16.078 | 5.995   | 37.949 | -149.143 | -154.912 | -77.649  |
| 45 | B | 31 | U     | U    | -60.871  | 178.141  | 45.900   | 85.006  | 7.255   | -28.461 | 37.695  | -34.623 | 17.292 | 7.948   | 38.061 | -150.496 | -151.162 | -77.442  |
| 46 | B | 32 | G     | G    | -73.614  | 165.784  | 65.777   | 84.089  | 3.736   | -25.845 | 36.853  | -35.802 | 20.215 | 13.120  | 37.841 | -161.707 | -157.906 | -56.055  |
| 47 | B | 33 | A     | A    | -73.534  | -160.870 | 37.994   | 84.918  | 3.987   | -25.264 | 35.690  | -34.500 | 19.274 | 12.585  | 36.568 | -150.788 | .....    | .....    |

**Supplementary Figure 3.** The values of all angles characteristic for nucleotide conformation for the D-target/D-ribozyme.

## Supplementary Fig. 4

### D-target / L-ribozyme

|    |   |    | alpha | beta | gamma    | delta    | v0       | v1       | v2      | v3      | v4      | P       | fi      | chi      | epsi   | zeta     |          |          |
|----|---|----|-------|------|----------|----------|----------|----------|---------|---------|---------|---------|---------|----------|--------|----------|----------|----------|
| 1  | A | 1  | C     | c    | .....    | .....    | 164.222  | 146.659  | -19.375 | 35.116  | -36.601 | 26.458  | -4.659  | 168.277  | 37.381 | -144.241 | 13.607   | 142.497  |
| 2  | A | 2  | U     | U    | -78.887  | -94.873  | -153.391 | 150.023  | -23.339 | 40.503  | -41.712 | 29.198  | -3.783  | 166.483  | 42.900 | 170.421  | -75.401  | -172.580 |
| 3  | A | 3  | U     | U    | 8.817    | -117.388 | 177.122  | 146.878  | -31.210 | 45.305  | -41.734 | 24.706  | 3.889   | 156.557  | 45.489 | -166.375 | -76.543  | 179.578  |
| 4  | A | 4  | C     | C    | 18.954   | -139.762 | -154.618 | 154.137  | -21.027 | 40.115  | -43.093 | 31.851  | -6.946  | 170.437  | 43.701 | -178.880 | -27.506  | -179.805 |
| 5  | A | 5  | A     | A    | -35.403  | -97.865  | -156.265 | 135.915  | -32.079 | 40.331  | -33.142 | 15.635  | 10.124  | 146.741  | 39.635 | 147.522  | -96.868  | -126.533 |
| 6  | A | 6  | A     | A    | 32.259   | -121.755 | -154.915 | 131.336  | -27.558 | 35.260  | -29.300 | 14.385  | 8.057   | 147.935  | 34.574 | 159.336  | 52.774   | 86.271   |
| 7  | A | 7  | G     | G    | 91.145   | 130.433  | 139.122  | 153.472  | -23.975 | 42.049  | -43.314 | 30.557  | -4.295  | 166.839  | 44.483 | -172.704 | -74.261  | 170.308  |
| 8  | A | 8  | U     | U    | 27.930   | -138.622 | -162.362 | 147.797  | -27.578 | 42.721  | -41.236 | 26.186  | 0.753   | 160.530  | 43.737 | 170.780  | -89.103  | -178.780 |
| 9  | A | 9  | C     | C    | 14.533   | -100.460 | -142.464 | 115.688  | -38.274 | 34.049  | -17.800 | -3.419  | 26.059  | 118.287  | 37.562 | 91.266   | -140.318 | 73.980   |
| 10 | A | 10 | C     | C    | -104.942 | 157.105  | -129.380 | 148.493  | -19.568 | 36.256  | -38.245 | 28.010  | -5.501  | 169.266  | 38.927 | -159.663 | 1.290    | 164.203  |
| 11 | A | 11 | G     | G    | -81.544  | -86.543  | -149.807 | 147.391  | -19.316 | 35.462  | -37.311 | 27.280  | -5.187  | 169.004  | 38.009 | 161.832  | -148.536 | -123.961 |
| 12 | A | 12 | C     | C    | 102.830  | -169.643 | -174.958 | 147.445  | -24.472 | 40.063  | -39.776 | 26.653  | -1.533  | 163.462  | 41.493 | 179.044  | -84.161  | -174.064 |
| 13 | A | 13 | C     | C    | 20.369   | -123.772 | -155.549 | 142.191  | -24.795 | 37.642  | -35.636 | 22.304  | 1.418   | 159.251  | 38.108 | 144.063  |          |          |
| 14 | A | 14 | A     | A    | 122.579  | 154.042  | 161.777  | 151.082  | -10.431 | 29.934  | -37.025 | 32.032  | -13.727 | -177.289 | 37.067 | -171.022 | -18.443  | 47.018   |
| 15 | B | 1  | U     | u    | .....    | .....    | -30.150  | -89.321  | -14.337 | 32.553  | -37.461 | 30.265  | -10.157 | 176.789  | 37.520 | 135.856  | 149.632  | 73.630   |
| 16 | B | 2  | G     | G    | 49.832   | -176.983 | -47.430  | -81.485  | 13.007  | 11.534  | -30.058 | 38.364  | -32.290 | -142.057 | 38.114 | 123.003  | 151.421  | 47.830   |
| 17 | B | 3  | G     | G    | 127.835  | -113.124 | -136.068 | -90.938  | -15.433 | 32.675  | -36.613 | 28.786  | -8.553  | 174.541  | 36.780 | 157.840  | 145.918  | 61.988   |
| 18 | B | 4  | C     | C    | 62.413   | 178.813  | -45.121  | -83.364  | -4.198  | 26.696  | -37.783 | 36.446  | -20.340 | -167.447 | 38.708 | 146.012  | 148.632  | 72.414   |
| 19 | B | 5  | G     | G    | 54.253   | -177.329 | -61.192  | -139.575 | 26.364  | -37.868 | 34.378  | -20.216 | -3.652  | -24.253  | 37.706 | 111.871  | 167.008  | 108.029  |
| 20 | B | 6  | C     | C    | 66.558   | 177.863  | -41.409  | -138.348 | 29.161  | -39.497 | 34.419  | -18.619 | -6.415  | -28.055  | 39.002 | 109.564  | 95.331   | -156.438 |
| 21 | B | 7  | U     | U    | 85.743   | -114.863 | -73.967  | -87.212  | 20.752  | 0.869   | -20.469 | 32.904  | -33.730 | -126.060 | 34.773 | 166.293  | 141.847  | 54.719   |
| 22 | B | 8  | G     | G    | -159.269 | -149.195 | -59.837  | -84.186  | -2.501  | 24.455  | -35.857 | 35.489  | -20.816 | -165.106 | 37.103 | -174.092 | 130.740  | 73.490   |
| 23 | B | 9  | A     | A    | 57.641   | -170.436 | -38.110  | -87.955  | -13.283 | 32.510  | -38.309 | 31.737  | -11.737 | 178.873  | 38.317 | 160.226  | 117.589  | 81.954   |
| 24 | B | 10 | U     | U    | -2.720   | 149.771  | -50.037  | -131.620 | 30.899  | -37.406 | 29.594  | -12.757 | -11.191 | -36.232  | 36.688 | 138.811  | 81.007   | -66.509  |
| 25 | B | 11 | G     | G    | 145.610  | 166.222  | -57.092  | -97.247  | -18.159 | 31.452  | -32.103 | 22.684  | -3.043  | 166.410  | 33.027 | 100.076  | 141.106  | -90.807  |
| 26 | B | 12 | A     | A    | 76.968   | -161.162 | -51.653  | -88.391  | -12.705 | 31.643  | -37.555 | 31.352  | -11.858 | 179.436  | 37.557 | 178.835  | 134.905  | 55.653   |
| 27 | B | 13 | G     | G    | 70.783   | -173.665 | -55.989  | -83.013  | -5.360  | 27.907  | -38.601 | 36.579  | -19.683 | -169.046 | 39.317 | 172.823  | 157.768  | 68.932   |
| 28 | B | 14 | G     | G    | 60.248   | 170.333  | -43.826  | -80.264  | 2.680   | 21.905  | -36.714 | 39.282  | -26.401 | -157.650 | 39.696 | 164.737  | 153.443  | 69.897   |
| 29 | B | 15 | C     | C    | 82.818   | -170.541 | -71.076  | -82.501  | -0.045  | 23.293  | -36.361 | 37.376  | -23.509 | -161.453 | 38.353 | 158.252  | 158.969  | 70.718   |
| 30 | B | 16 | C     | C    | 70.138   | 166.520  | -40.875  | -85.044  | -7.466  | 28.708  | -37.865 | 34.639  | -17.179 | -172.354 | 38.205 | 145.770  | 151.035  | 61.549   |
| 31 | B | 17 | G     | G    | 67.505   | 178.460  | -46.256  | -83.646  | -4.475  | 26.740  | -37.580 | 36.084  | -19.936 | -167.896 | 38.435 | 158.754  | 143.235  | 61.884   |
| 32 | B | 18 | A     | A    | -144.010 | -151.773 | -66.005  | -88.061  | -9.317  | 28.788  | -36.221 | 31.961  | -14.362 | -175.784 | 36.319 | 168.074  | 142.551  | 62.504   |
| 33 | B | 19 | A     | A    | 77.095   | -162.934 | -67.330  | -88.760  | -11.212 | 30.081  | -36.448 | 31.098  | -12.641 | -178.751 | 36.456 | 163.753  | 153.127  | 59.288   |
| 34 | B | 20 | A     | A    | 69.472   | 175.343  | -46.558  | -89.937  | -13.350 | 31.391  | -36.513 | 29.927  | -10.569 | 177.836  | 36.539 | 147.238  | 126.420  | 86.797   |
| 35 | B | 21 | G     | G    | -112.427 | 114.230  | 157.866  | -89.034  | -13.496 | 32.092  | -37.479 | 30.803  | -11.011 | 178.126  | 37.499 | -179.726 | 145.904  | 63.339   |
| 36 | B | 22 | G     | G    | 63.018   | 175.722  | -47.778  | -82.389  | -0.025  | 23.322  | -36.405 | 37.435  | -23.568 | -161.423 | 38.407 | 168.556  | 154.708  | 64.725   |
| 37 | B | 23 | C     | C    | 64.855   | 177.572  | -46.466  | -82.788  | 0.437   | 22.613  | -35.729 | 37.029  | -23.579 | -160.736 | 37.848 | 150.547  | 155.438  | 70.799   |
| 38 | B | 24 | C     | C    | -105.567 | 157.954  | 132.617  | -85.112  | -5.394  | 26.873  | -36.960 | 34.952  | -18.654 | -169.375 | 37.605 | 165.713  | 146.760  | 52.047   |
| 39 | B | 25 | G     | G    | 72.267   | -172.202 | -58.431  | -84.484  | -2.572  | 24.339  | -35.582 | 35.144  | -20.544 | -165.277 | 36.790 | 164.749  | 177.474  | 102.057  |
| 40 | B | 26 | A     | A    | 55.182   | 163.830  | -47.493  | -89.910  | -12.200 | 30.430  | -36.082 | 30.141  | -11.418 | 179.448  | 36.084 | 153.797  | 143.530  | 63.663   |
| 41 | B | 27 | A     | A    | 62.127   | -170.488 | -47.747  | -87.105  | -10.480 | 30.376  | -37.633 | 32.691  | -14.083 | -177.075 | 37.682 | 150.866  | 147.901  | 71.223   |
| 42 | B | 28 | A     | A    | 67.271   | -158.578 | -70.648  | -85.386  | -7.201  | 28.307  | -37.472 | 34.391  | -17.194 | -172.064 | 37.834 | 145.769  | 141.252  | 72.587   |
| 43 | B | 29 | C     | C    | 77.089   | -173.161 | -56.942  | -83.761  | -6.833  | 28.964  | -38.855 | 36.005  | -18.412 | -171.150 | 39.323 | 148.089  | 157.835  | 62.014   |
| 44 | B | 30 | U     | U    | 68.637   | 170.888  | -44.821  | -81.557  | 2.658   | 21.213  | -35.629 | 38.171  | -25.698 | -157.547 | 38.552 | 137.465  | 160.413  | 71.078   |
| 45 | B | 31 | U     | U    | 69.745   | -178.743 | -54.363  | -83.666  | -1.426  | 23.835  | -35.875 | 36.106  | -21.871 | -163.495 | 37.417 | 133.287  | 156.296  | 69.316   |
| 46 | B | 32 | G     | G    | 79.973   | -165.465 | -70.702  | -82.264  | 2.733   | 20.766  | -34.963 | 37.546  | -25.366 | -157.360 | 37.882 | 152.883  | 157.461  | 61.872   |
| 47 | B | 33 | A     | A    | 64.325   | 175.082  | -46.354  | -82.663  | 2.157   | 20.800  | -34.467 | 36.747  | -24.521 | -158.109 | 37.146 | 139.233  | .....    | .....    |

**Supplementary Figure 4.** The values of all angles characteristic for nucleotide conformation for the D-target/L-ribozyme.



## Supplementary Fig. 5

### L-target / L-ribozyme

|    |   |    | alpha | beta | gamma    | delta    | v0       | v1       | v2      | v3      | v4      | P       | fi      | chi      | epsi   | zeta     |         |          |
|----|---|----|-------|------|----------|----------|----------|----------|---------|---------|---------|---------|---------|----------|--------|----------|---------|----------|
| 1  | A | 1  | C     | c    | .....    | .....    | -21.366  | -90.226  | -17.627 | 35.063  | -38.302 | 29.235  | -7.446  | 172.266  | 38.653 | 176.509  | 111.026 | 63.033   |
| 2  | A | 2  | U     | U    | 46.787   | -153.260 | -54.614  | -82.240  | 0.583   | 22.696  | -36.023 | 37.437  | -23.921 | -160.507 | 38.213 | 160.081  | 141.569 | 58.962   |
| 3  | A | 3  | U     | U    | 68.174   | -176.487 | -47.443  | -86.061  | -9.744  | 30.318  | -38.280 | 33.747  | -15.188 | -175.693 | 38.389 | 156.899  | 154.743 | 64.293   |
| 4  | A | 4  | C     | C    | 63.419   | 168.774  | -35.807  | -83.824  | -6.584  | 28.629  | -38.614 | 35.899  | -18.514 | -170.822 | 39.114 | 152.727  | 154.947 | 77.075   |
| 5  | A | 5  | A     | A    | 56.952   | 179.178  | -39.213  | -85.106  | -8.801  | 29.940  | -38.553 | 34.581  | -16.317 | -174.150 | 38.755 | 148.829  | 154.722 | 71.277   |
| 6  | A | 6  | A     | A    | 64.714   | -169.374 | -58.132  | -82.239  | -1.740  | 24.926  | -37.312 | 37.383  | -22.470 | -163.880 | 38.839 | 160.765  | 155.226 | 74.293   |
| 7  | A | 7  | G     | G    | 69.731   | -179.326 | -54.871  | -83.841  | -2.219  | 24.542  | -36.234 | 36.022  | -21.332 | -164.659 | 37.573 | 155.639  | 156.622 | 59.029   |
| 8  | A | 8  | U     | U    | 72.061   | 166.985  | -42.143  | -86.780  | -3.167  | 23.695  | -34.008 | 33.268  | -19.007 | -166.353 | 34.996 | 149.772  | 125.579 | 80.833   |
| 9  | A | 9  | C     | C    | 49.994   | -179.794 | -44.694  | -141.940 | 23.128  | -35.618 | 33.805  | -21.594 | -0.744  | -20.014  | 35.978 | 119.223  | 110.108 | -87.206  |
| 10 | A | 10 | C     | C    | -78.990  | 141.368  | 75.633   | -85.054  | -7.454  | 28.578  | -37.724 | 34.512  | -17.094 | -172.360 | 38.062 | 162.605  | 125.778 | 78.259   |
| 11 | A | 11 | G     | G    | 80.927   | -147.103 | -83.618  | -81.370  | 8.832   | 15.334  | -32.154 | 38.145  | -29.542 | -148.272 | 37.803 | -177.494 | 154.920 | 64.279   |
| 12 | A | 12 | C     | C    | 74.374   | 163.385  | -40.445  | -84.984  | -7.077  | 28.397  | -37.737 | 34.751  | -17.497 | -171.782 | 38.129 | 149.326  | 124.839 | 82.385   |
| 13 | A | 13 | C     | C    | 88.733   | -115.061 | -106.604 | -86.786  | -12.038 | 31.873  | -38.565 | 32.679  | -13.085 | -179.105 | 38.569 | 177.337  |         |          |
| 14 | A | 14 | A     | A    | 74.069   | 162.507  | -45.198  | -86.712  | -10.270 | 30.383  | -37.838 | 33.021  | -14.428 | -176.660 | 37.902 | 162.724  | 70.740  | 30.014   |
| 15 | B | 1  | U     | u    | .....    | .....    | -57.917  | -86.080  | -6.279  | 27.184  | -36.563 | 34.007  | -17.538 | -170.871 | 37.032 | 163.467  | 160.732 | 57.819   |
| 16 | B | 2  | G     | G    | 69.475   | 162.123  | -37.766  | -81.471  | -0.855  | 24.546  | -37.548 | 38.127  | -23.452 | -162.616 | 39.345 | 154.141  | 133.265 | 79.203   |
| 17 | B | 3  | G     | G    | 92.980   | -121.417 | -111.047 | -86.319  | -7.235  | 27.612  | -36.362 | 33.277  | -16.470 | -172.416 | 36.683 | 179.582  | 145.097 | 67.763   |
| 18 | B | 4  | C     | C    | 68.609   | 173.708  | -44.451  | -86.649  | -10.354 | 30.554  | -38.064 | 33.169  | -14.438 | -176.727 | 38.126 | 156.942  | 150.889 | 74.422   |
| 19 | B | 5  | G     | G    | 64.480   | 172.070  | -61.889  | -146.574 | 18.233  | -34.282 | 36.392  | -26.971 | 5.696   | -10.049  | 36.959 | 129.649  | 165.887 | 108.997  |
| 20 | B | 6  | C     | C    | 67.396   | 175.810  | -43.612  | -138.742 | 30.431  | -40.415 | 34.669  | -18.156 | -7.501  | -29.428  | 39.805 | 119.443  | 88.370  | -154.595 |
| 21 | B | 7  | U     | U    | 80.029   | -111.864 | -76.116  | -84.754  | -1.832  | 23.626  | -35.183 | 35.167  | -21.026 | -164.154 | 36.573 | 152.242  | 147.487 | 47.501   |
| 22 | B | 8  | G     | G    | -152.385 | -149.229 | -60.567  | -85.197  | -5.263  | 26.505  | -36.476 | 34.529  | -18.496 | -169.278 | 37.124 | -179.958 | 135.643 | 68.930   |
| 23 | B | 9  | A     | A    | 59.584   | -169.384 | -42.132  | -85.583  | -13.886 | 34.393  | -40.748 | 33.792  | -12.663 | 179.167  | 40.752 | 160.222  | 114.470 | 69.838   |
| 24 | B | 10 | U     | U    | 7.844    | 137.265  | -41.712  | -139.671 | 24.288  | -36.031 | 33.499  | -20.534 | -2.147  | -22.133  | 36.163 | 141.336  | 80.687  | -59.751  |
| 25 | B | 11 | G     | G    | 128.453  | 165.461  | -52.811  | -93.611  | -17.874 | 33.483  | -35.575 | 26.357  | -5.514  | 169.909  | 36.134 | 76.689   | 155.810 | -99.913  |
| 26 | B | 12 | A     | A    | 48.652   | -140.079 | -38.378  | -87.198  | -10.988 | 30.667  | -37.635 | 32.401  | -13.583 | -177.860 | 37.662 | -177.297 | 127.770 | 64.205   |
| 27 | B | 13 | G     | G    | 62.861   | -166.158 | -54.154  | -82.511  | -4.992  | 27.893  | -38.933 | 37.129  | -20.265 | -168.440 | 39.739 | 173.510  | 158.088 | 71.101   |
| 28 | B | 14 | G     | G    | 62.527   | 172.737  | -49.002  | -80.561  | 2.284   | 22.141  | -36.749 | 39.107  | -26.046 | -158.174 | 39.587 | 167.878  | 149.165 | 71.564   |
| 29 | B | 15 | C     | C    | 83.511   | -170.006 | -71.328  | -81.767  | -0.992  | 24.562  | -37.456 | 37.915  | -23.253 | -162.832 | 39.202 | 165.707  | 158.311 | 71.753   |
| 30 | B | 16 | C     | C    | 66.411   | 166.741  | -38.710  | -85.536  | -8.909  | 29.894  | -38.384 | 34.359  | -16.092 | -174.369 | 38.570 | 151.287  | 153.911 | 59.607   |
| 31 | B | 17 | G     | G    | 69.482   | 175.912  | -45.580  | -83.599  | -5.690  | 27.922  | -38.303 | 36.122  | -19.198 | -169.567 | 38.947 | 155.190  | 142.321 | 63.266   |
| 32 | B | 18 | A     | A    | -144.611 | -154.520 | -62.997  | -88.616  | -10.229 | 29.227  | -36.033 | 31.244  | -13.336 | -177.355 | 36.072 | 171.537  | 141.592 | 67.299   |
| 33 | B | 19 | A     | A    | 73.744   | -161.422 | -66.845  | -89.134  | -11.486 | 30.159  | -36.325 | 30.801  | -12.281 | -179.264 | 36.328 | 164.032  | 157.899 | 51.759   |
| 34 | B | 20 | A     | A    | 78.586   | 164.728  | -45.923  | -91.301  | -14.997 | 32.116  | -36.084 | 28.543  | -8.669  | 174.906  | 36.227 | 144.394  | 137.327 | 80.967   |
| 35 | B | 21 | G     | G    | -120.757 | 120.675  | 160.908  | -88.132  | -12.608 | 31.902  | -38.009 | 31.870  | -12.251 | 179.809  | 38.010 | 177.614  | 145.813 | 64.435   |
| 36 | B | 22 | G     | G    | 66.079   | 178.400  | -53.428  | -81.092  | 3.145   | 20.995  | -35.720 | 38.552  | -26.245 | -156.876 | 38.841 | 167.010  | 155.551 | 61.680   |
| 37 | B | 23 | C     | C    | 69.058   | 175.907  | -48.491  | -82.190  | 2.432   | 20.969  | -35.001 | 37.440  | -25.101 | -157.781 | 37.809 | 152.722  | 153.336 | 73.972   |
| 38 | B | 24 | C     | C    | -101.884 | 156.775  | 129.683  | -84.721  | -6.539  | 28.161  | -37.891 | 35.195  | -18.080 | -170.950 | 38.369 | 164.723  | 145.073 | 53.673   |
| 39 | B | 25 | G     | G    | 67.769   | -163.185 | -64.541  | -83.999  | -2.636  | 24.815  | -36.308 | 35.847  | -20.940 | -165.290 | 37.538 | 168.405  | 167.313 | 108.742  |
| 40 | B | 26 | A     | A    | 57.211   | 166.720  | -46.860  | -88.982  | -11.980 | 30.670  | -36.650 | 30.862  | -12.008 | -179.889 | 36.650 | 161.581  | 146.149 | 59.852   |
| 41 | B | 27 | A     | A    | 67.364   | -174.504 | -48.661  | -86.072  | -11.404 | 31.763  | -38.959 | 33.478  | -13.997 | -177.942 | 38.985 | 156.068  | 147.217 | 75.234   |
| 42 | B | 28 | A     | A    | 61.972   | -156.179 | -62.698  | -85.665  | -7.444  | 28.391  | -37.364 | 34.174  | -16.911 | -172.446 | 37.691 | 160.529  | 140.536 | 76.901   |
| 43 | B | 29 | C     | C    | 64.925   | 179.689  | -40.847  | -85.806  | -10.506 | 31.173  | -38.862 | 33.903  | -14.850 | -176.615 | 38.930 | 155.144  | 157.121 | 68.728   |
| 44 | B | 30 | U     | U    | 63.304   | 173.959  | -41.453  | -85.990  | -8.513  | 29.272  | -37.742 | 33.906  | -16.078 | -174.005 | 37.949 | 149.143  | 154.912 | 77.649   |
| 45 | B | 31 | U     | U    | 60.871   | -178.141 | -45.900  | -85.006  | -7.255  | 28.461  | -37.695 | 34.623  | -17.292 | -172.052 | 38.061 | 150.496  | 151.162 | 77.442   |
| 46 | B | 32 | G     | G    | 73.614   | -165.784 | -65.777  | -84.089  | -3.736  | 25.845  | -36.853 | 35.802  | -20.215 | -166.880 | 37.841 | 161.707  | 157.906 | 56.055   |
| 47 | B | 33 | A     | A    | 73.534   | 160.870  | -37.994  | -84.918  | -3.987  | 25.264  | -35.690 | 34.500  | -19.274 | -167.415 | 36.568 | 150.788  | .....   | .....    |

**Supplementary Figure 5.** The values of all angles characteristic for nucleotide conformation for the L-target/L-ribozyme.

## Supplementary Fig. 6

### L-target / D-ribozyme

|    |   |    | alpha | beta     | gamma    | delta    | v0       | v1      | v2      | v3      | v4      | P       | fi      | chi    | epsi     | zeta     |          |
|----|---|----|-------|----------|----------|----------|----------|---------|---------|---------|---------|---------|---------|--------|----------|----------|----------|
| 1  | A | 1  | C c   | .....    | .....    | -164.222 | -146.659 | 19.375  | -35.116 | 36.601  | -26.458 | 4.659   | -11.723 | 37.381 | 144.241  | -13.607  | -142.497 |
| 2  | A | 2  | U U   | 78.887   | 94.873   | 153.391  | -150.023 | 23.339  | -40.503 | 41.712  | -29.198 | 3.783   | -13.517 | 42.900 | -170.421 | 75.401   | 172.580  |
| 3  | A | 3  | U U   | -8.817   | 117.388  | -177.122 | -146.878 | 31.210  | -45.305 | 41.734  | -24.706 | -3.889  | -23.443 | 45.489 | 166.375  | 76.543   | -179.578 |
| 4  | A | 4  | C C   | -18.954  | 139.762  | 154.618  | -154.137 | 21.027  | -40.115 | 43.093  | -31.851 | 6.946   | -9.563  | 43.701 | 178.880  | 27.506   | 179.805  |
| 5  | A | 5  | A A   | 35.403   | 97.865   | 156.265  | -135.915 | 32.079  | -40.331 | 33.142  | -15.635 | -10.124 | -33.259 | 39.635 | -147.522 | 96.868   | 126.533  |
| 6  | A | 6  | A A   | -32.259  | 121.755  | 154.915  | -131.336 | 27.558  | -35.260 | 29.300  | -14.385 | -8.057  | -32.065 | 34.574 | -159.336 | -52.774  | -86.271  |
| 7  | A | 7  | G G   | -91.145  | -130.433 | -139.122 | -153.472 | 23.975  | -42.049 | 43.314  | -30.557 | 4.295   | -13.161 | 44.483 | 172.704  | 74.261   | -170.308 |
| 8  | A | 8  | U U   | -27.930  | 138.622  | 162.362  | -147.797 | 27.578  | -42.721 | 41.236  | -26.186 | -0.753  | -19.470 | 43.737 | -170.780 | 89.103   | 178.780  |
| 9  | A | 9  | C C   | -14.533  | 100.460  | 142.464  | -115.688 | 38.274  | -34.049 | 17.800  | 3.419   | -26.059 | -61.713 | 37.562 | -91.266  | 140.318  | -73.980  |
| 10 | A | 10 | C C   | 104.942  | -157.105 | 129.380  | -148.493 | 19.568  | -36.256 | 38.245  | -28.010 | 5.501   | -10.734 | 38.927 | 159.663  | -1.290   | -164.203 |
| 11 | A | 11 | G G   | 81.544   | 86.543   | 149.807  | -147.391 | 19.316  | -35.462 | 37.311  | -27.280 | 5.187   | -10.996 | 38.009 | -161.832 | 148.536  | 123.961  |
| 12 | A | 12 | C C   | -102.830 | 169.643  | 174.958  | -147.445 | 24.472  | -40.063 | 39.776  | -26.653 | 1.533   | -16.538 | 41.493 | -179.044 | 84.161   | 174.064  |
| 13 | A | 13 | C C   | -20.369  | 123.772  | 155.549  | -142.191 | 24.795  | -37.642 | 35.636  | -22.304 | -1.418  | -20.749 | 38.108 | -144.063 |          |          |
| 14 | A | 14 | A A   | -122.579 | -154.042 | -161.777 | -151.082 | 10.431  | -29.934 | 37.025  | -32.032 | 13.727  | 2.711   | 37.067 | 171.022  | 18.443   | -47.018  |
| 15 | B | 1  | U u   | .....    | .....    | 30.150   | 89.321   | 14.337  | -32.553 | 37.461  | -30.265 | 10.157  | -3.211  | 37.520 | -135.856 | -149.632 | -73.630  |
| 16 | B | 2  | G G   | -49.832  | 176.983  | 47.430   | 81.485   | -13.007 | -11.534 | 30.058  | -38.364 | 32.290  | 37.943  | 38.114 | -123.003 | -151.421 | -47.830  |
| 17 | B | 3  | G G   | -127.835 | 113.124  | 136.068  | 90.938   | 15.433  | -32.675 | 36.613  | -28.786 | 8.553   | -5.459  | 36.780 | -157.840 | -145.918 | -61.988  |
| 18 | B | 4  | C C   | -62.413  | -178.813 | 45.121   | 83.364   | 4.198   | -26.696 | 37.783  | -36.446 | 20.340  | 12.553  | 38.708 | -146.012 | -148.632 | -72.414  |
| 19 | B | 5  | G G   | -54.253  | 177.329  | 61.192   | 139.575  | -26.364 | 37.868  | -34.378 | 20.216  | 3.652   | 155.747 | 37.706 | -111.871 | -167.008 | -108.029 |
| 20 | B | 6  | C C   | -66.558  | -177.863 | 41.409   | 138.348  | -29.161 | 39.497  | -34.419 | 18.619  | 6.415   | 151.945 | 39.002 | -109.564 | -95.331  | 156.438  |
| 21 | B | 7  | U U   | -85.743  | 114.863  | 73.967   | 87.212   | -20.752 | -0.869  | 20.469  | -32.904 | 33.730  | 53.940  | 34.773 | -166.293 | -141.847 | -54.719  |
| 22 | B | 8  | G G   | 159.269  | 149.195  | 59.837   | 84.186   | 2.501   | -24.455 | 35.857  | -35.489 | 20.816  | 14.894  | 37.103 | 174.092  | -130.740 | -73.490  |
| 23 | B | 9  | A A   | -57.641  | 170.436  | 38.110   | 87.955   | 13.283  | -32.510 | 38.309  | -31.737 | 11.737  | -1.127  | 38.317 | -160.226 | -117.589 | -81.954  |
| 24 | B | 10 | U U   | 2.720    | -149.771 | 50.037   | 131.620  | -30.899 | 37.406  | -29.594 | 12.757  | 11.191  | 143.768 | 36.688 | -138.811 | -81.007  | 66.509   |
| 25 | B | 11 | G G   | -145.610 | -166.222 | 57.092   | 97.247   | 18.159  | -31.452 | 32.103  | -22.684 | 3.043   | -13.590 | 33.027 | -100.076 | -141.106 | 90.807   |
| 26 | B | 12 | A A   | -76.968  | 161.162  | 51.653   | 88.391   | 12.705  | -31.643 | 37.555  | -31.352 | 11.858  | -0.564  | 37.557 | -178.835 | -134.905 | -55.653  |
| 27 | B | 13 | G G   | -70.783  | 173.665  | 55.989   | 83.013   | 5.360   | -27.907 | 38.601  | -36.579 | 19.683  | 10.954  | 39.317 | -172.823 | -157.768 | -68.932  |
| 28 | B | 14 | G G   | -60.248  | -170.333 | 43.826   | 80.264   | -2.680  | -21.905 | 36.714  | -39.282 | 26.401  | 22.350  | 39.696 | -164.737 | -153.443 | -69.897  |
| 29 | B | 15 | C C   | -82.818  | 170.541  | 71.076   | 82.501   | 0.045   | -23.293 | 36.361  | -37.376 | 23.509  | 18.547  | 38.353 | -158.252 | -158.969 | -70.718  |
| 30 | B | 16 | C C   | -70.138  | -166.520 | 40.875   | 85.044   | 7.466   | -28.708 | 37.865  | -34.639 | 17.179  | 7.646   | 38.205 | -145.770 | -151.035 | -61.549  |
| 31 | B | 17 | G G   | -67.505  | -178.460 | 46.256   | 83.646   | 4.475   | -26.740 | 37.580  | -36.084 | 19.936  | 12.104  | 38.435 | -158.754 | -143.235 | -61.884  |
| 32 | B | 18 | A A   | 144.010  | 151.773  | 66.005   | 88.061   | 9.317   | -28.788 | 36.221  | -31.961 | 14.362  | 4.216   | 36.319 | -168.074 | -142.551 | -62.504  |
| 33 | B | 19 | A A   | -77.095  | 162.934  | 67.330   | 88.760   | 11.212  | -30.081 | 36.448  | -31.098 | 12.641  | 1.249   | 36.456 | -163.753 | -153.127 | -59.288  |
| 34 | B | 20 | A A   | -69.472  | -175.343 | 46.558   | 89.937   | 13.350  | -31.391 | 36.513  | -29.927 | 10.569  | -2.164  | 36.539 | -147.238 | -126.420 | -86.797  |
| 35 | B | 21 | G G   | 112.427  | -114.230 | -157.866 | 89.034   | 13.496  | -32.092 | 37.479  | -30.803 | 11.011  | -1.874  | 37.499 | 179.726  | -145.904 | -63.339  |
| 36 | B | 22 | G G   | -63.018  | -175.722 | 47.778   | 82.389   | 0.025   | -23.322 | 36.405  | -37.435 | 23.568  | 18.577  | 38.407 | -168.556 | -154.708 | -64.725  |
| 37 | B | 23 | C C   | -64.855  | -177.572 | 46.466   | 82.788   | -0.437  | -22.613 | 35.729  | -37.029 | 23.579  | 19.264  | 37.848 | -150.547 | -155.438 | -70.799  |
| 38 | B | 24 | C C   | 105.567  | -157.954 | -132.617 | 85.112   | 5.394   | -26.873 | 36.960  | -34.952 | 18.654  | 10.625  | 37.605 | -165.713 | -146.760 | -52.047  |
| 39 | B | 25 | G G   | -72.267  | 172.202  | 58.431   | 84.484   | 2.572   | -24.339 | 35.582  | -35.144 | 20.544  | 14.723  | 36.790 | -164.749 | -177.474 | -102.057 |
| 40 | B | 26 | A A   | -55.182  | -163.830 | 47.493   | 89.910   | 12.200  | -30.430 | 36.082  | -30.141 | 11.418  | -0.552  | 36.084 | -153.797 | -143.530 | -63.663  |
| 41 | B | 27 | A A   | -62.127  | 170.488  | 47.747   | 87.105   | 10.480  | -30.376 | 37.633  | -32.691 | 14.083  | 2.925   | 37.682 | -150.866 | -147.901 | -71.223  |
| 42 | B | 28 | A A   | -67.271  | 158.578  | 70.648   | 85.386   | 7.201   | -28.307 | 37.472  | -34.391 | 17.194  | 7.936   | 37.834 | -145.769 | -141.252 | -72.587  |
| 43 | B | 29 | C C   | -77.089  | 173.161  | 56.942   | 83.761   | 6.833   | -28.964 | 38.855  | -36.005 | 18.412  | 8.850   | 39.323 | -148.089 | -157.835 | -62.014  |
| 44 | B | 30 | U U   | -68.637  | -170.888 | 44.821   | 81.557   | -2.658  | -21.213 | 35.629  | -38.171 | 25.698  | 22.453  | 38.552 | -137.465 | -160.413 | -71.078  |
| 45 | B | 31 | U U   | -69.745  | 178.743  | 54.363   | 83.666   | 1.426   | -23.835 | 35.875  | -36.106 | 21.871  | 16.505  | 37.417 | -133.287 | -156.296 | -69.316  |
| 46 | B | 32 | G G   | -79.973  | 165.465  | 70.702   | 82.264   | -2.733  | -20.766 | 34.963  | -37.546 | 25.366  | 22.640  | 37.882 | -152.883 | -157.461 | -61.872  |
| 47 | B | 33 | A A   | -64.325  | -175.082 | 46.354   | 82.663   | -2.157  | -20.800 | 34.467  | -36.747 | 24.521  | 21.891  | 37.146 | -139.233 | .....    | .....    |

**Supplementary Figure 6.** The values of all angles characteristic for nucleotide conformation for the L-target/D-ribozyme.

### DD\_free

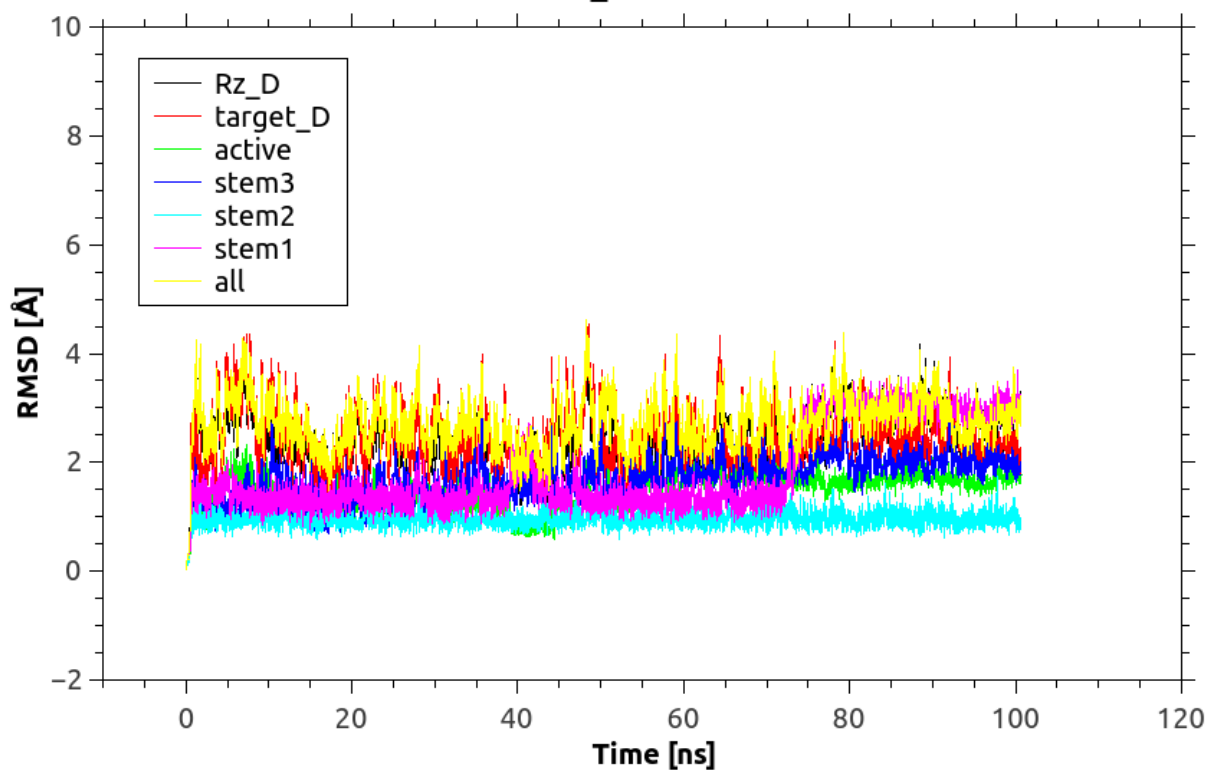

### LL\_free\_rmsd

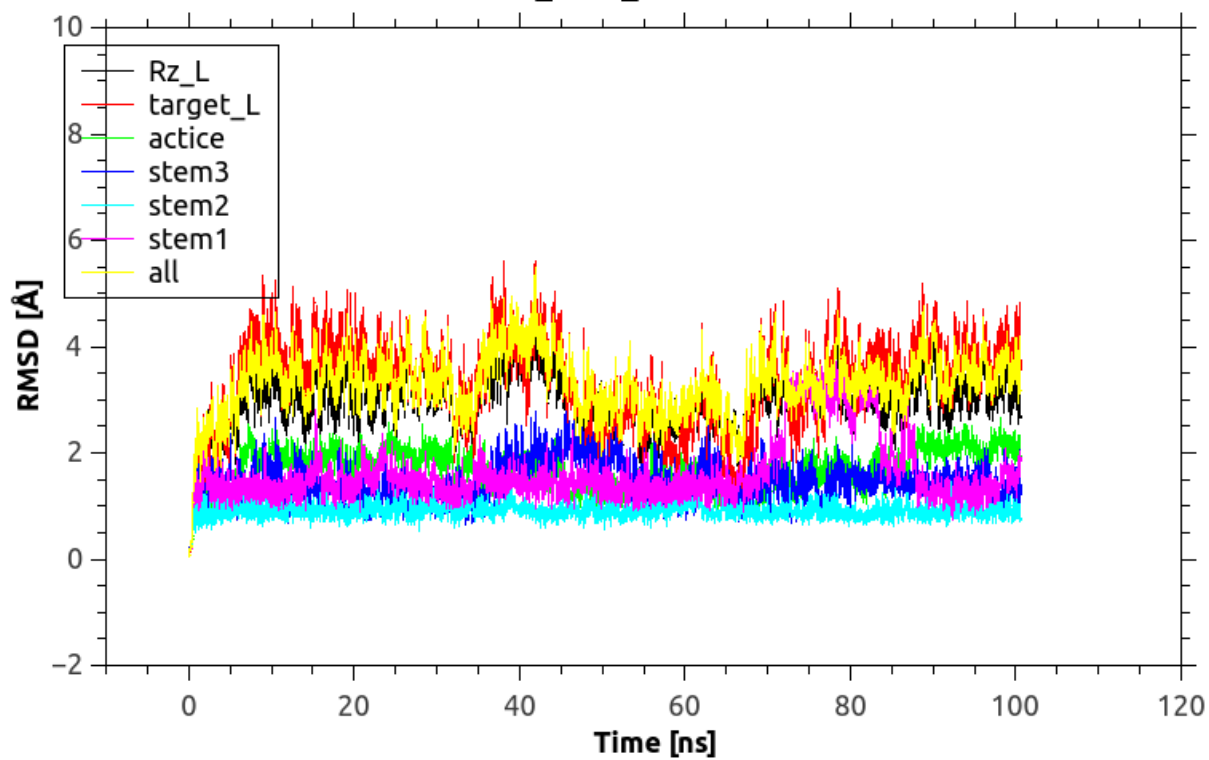

**Supplementary Figure 7.** RMSD for the whole homochiral ribozyme complexes with RNA (D/D or L/L) and their structural domains calculated without any restrains (free).

### LD\_free

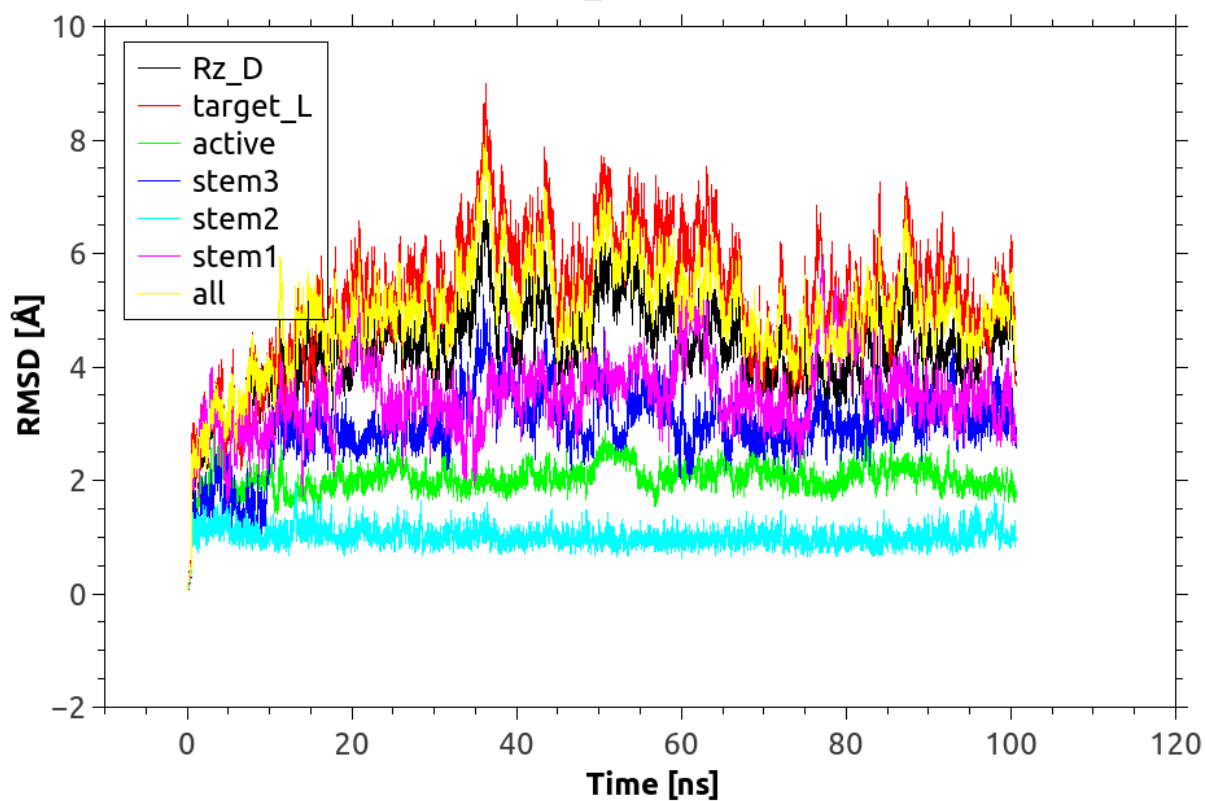

### DL\_free

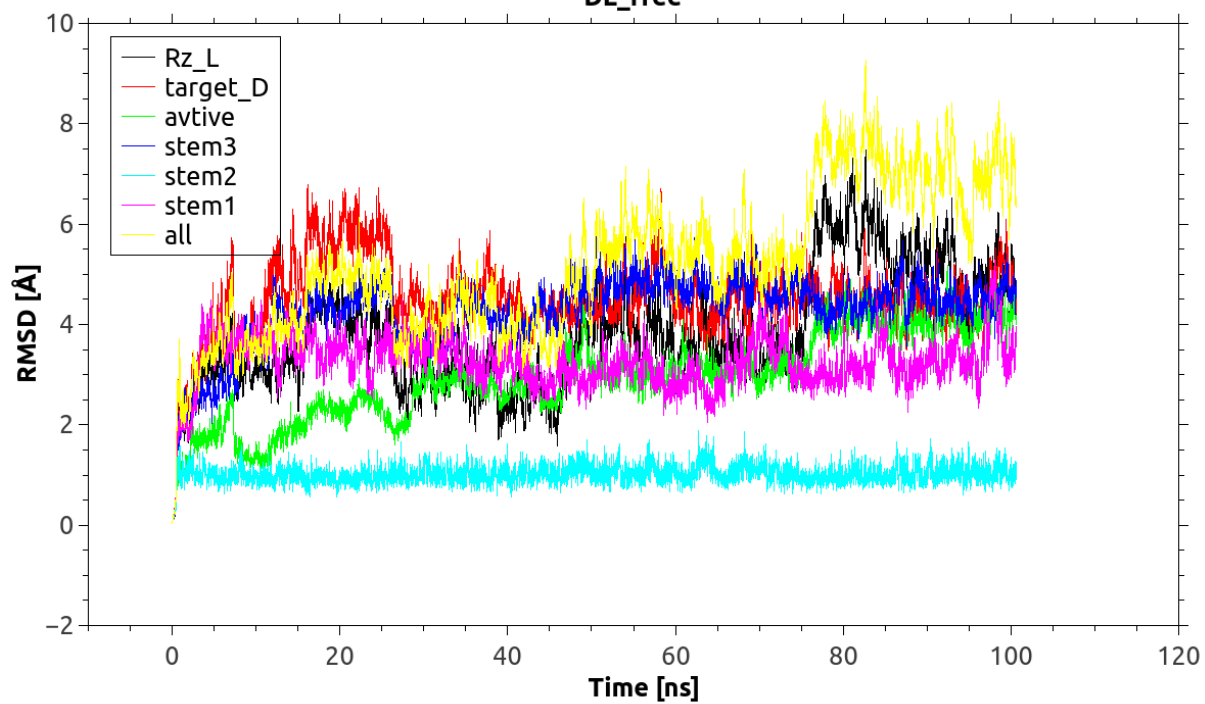

**Supplementary Figure 8.** RMSD for the whole ribozyme heterochiral complexes with substrate (LD or DL) and their structural domains calculated without any restrains.



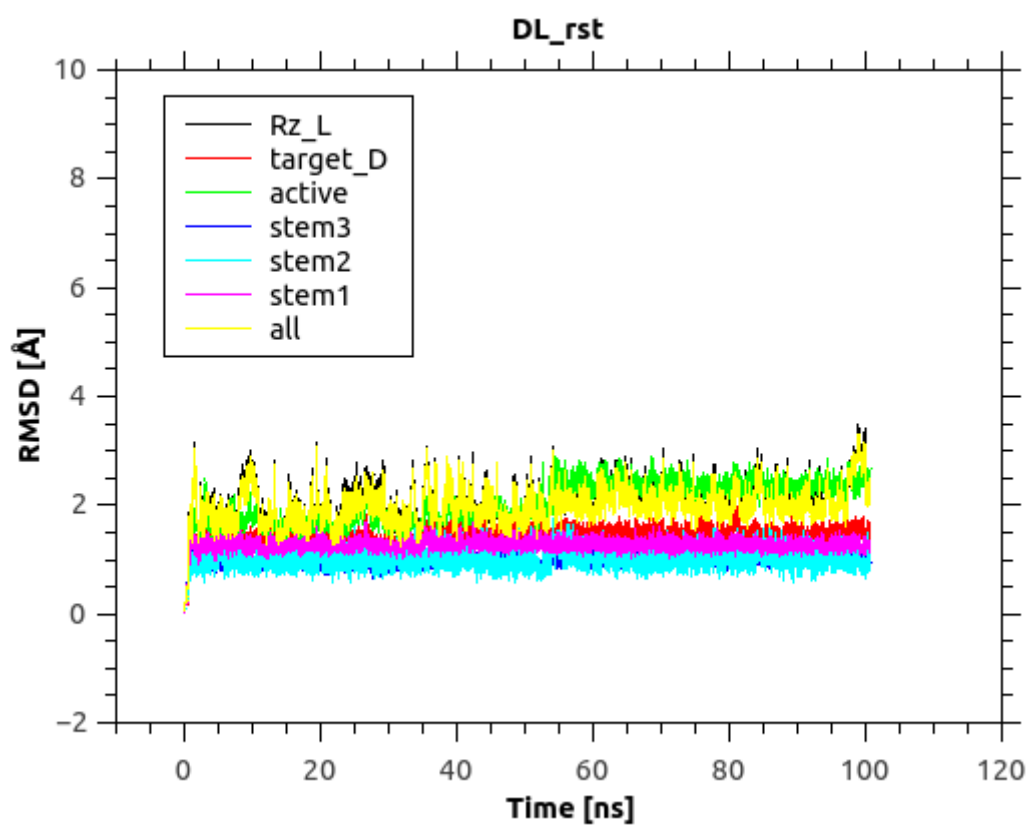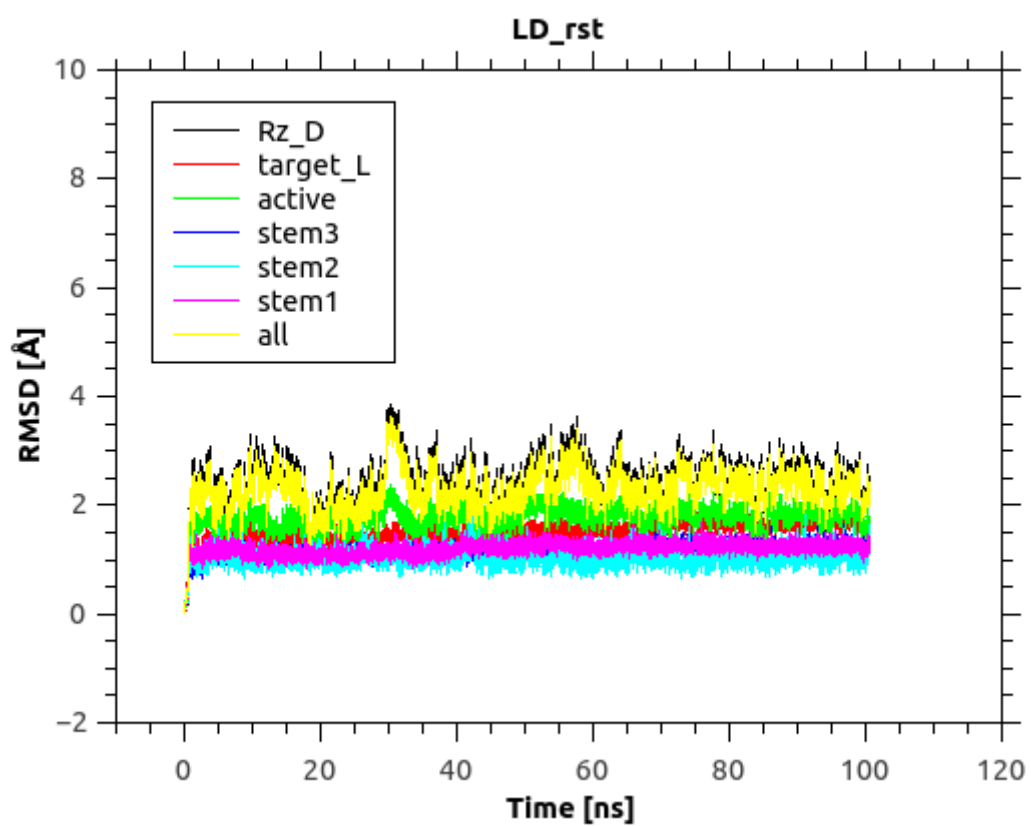

**Supplementary Figure 9.** RMSD for the whole heterochiral ribozyme complex with substrate (D/L or L/D) and their structural domains calculated with positional restrains (heavy atoms).
